# Supplementary material
Source: Springer Nature journal article supplement (https://www.springermedizin.de/resource/supplementary/13058_2010_9489_MOESM12_ESM.pdf/9702258)
Supplement: MOESM12 [file 9702258]

**control cohort**

**erlotinib  
prevention cohort**

ALDH1

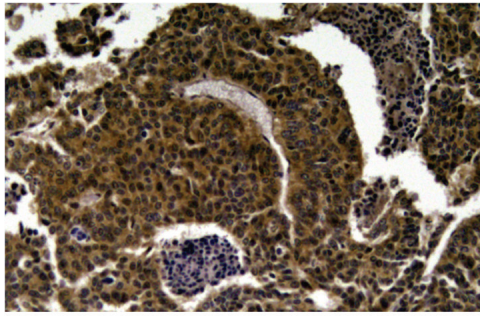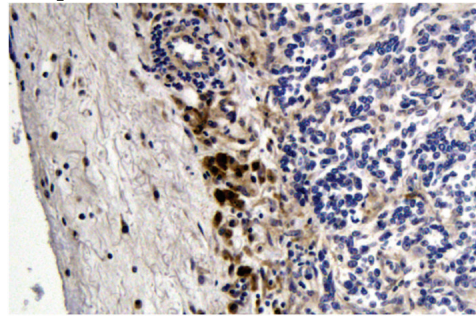

EGFR

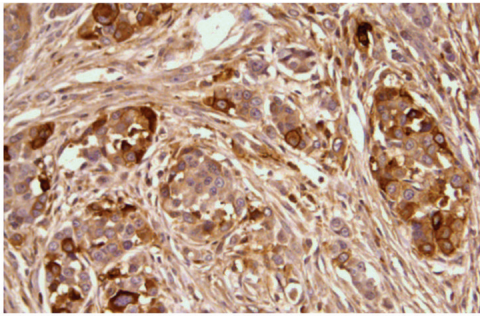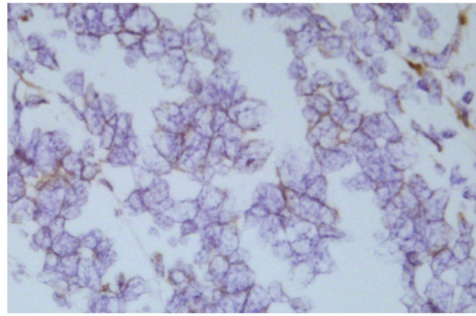

ER  $\alpha$

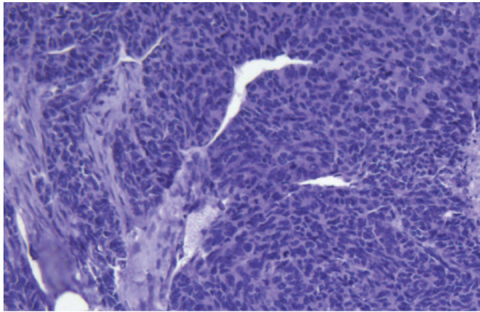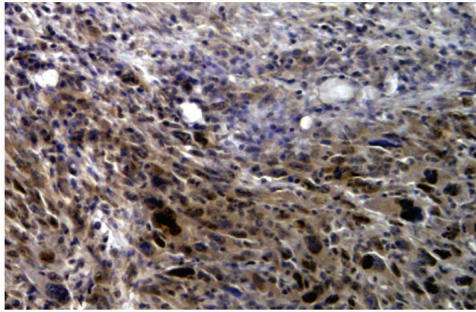

Ki67

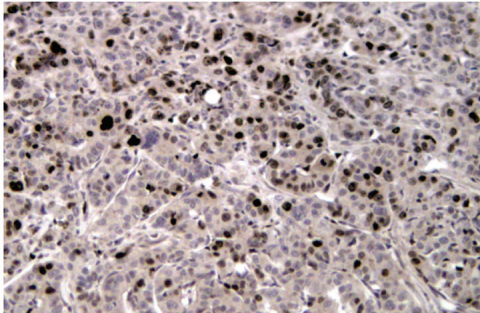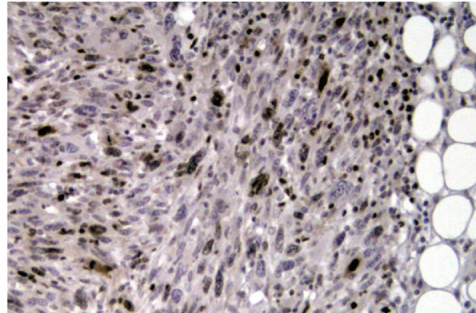

Cleaved  
Caspase 3

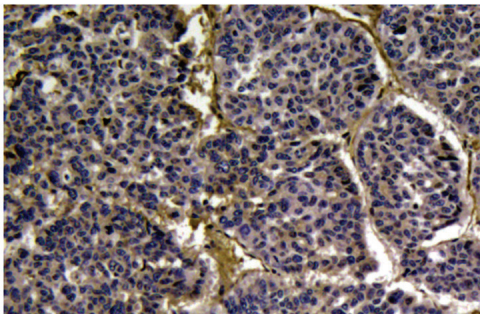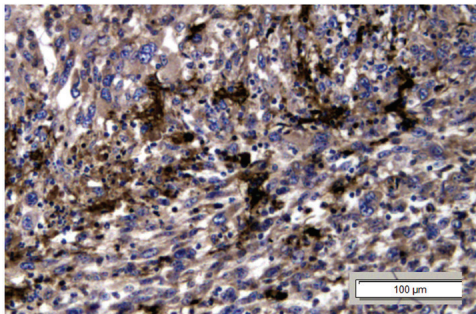

**supplemental Figure 2**
